# Supplementary material for: Urine-Based Detection of Biomarkers Indicative of Chronic Kidney Disease in a Patient Cohort from Ghana
Source: J Pers Med. 2022 Dec 24;13(1):38. doi: 10.3390/jpm13010038 (PMC9863148; doi:10.3390/jpm13010038)
Supplement: Supplementary file 1 [file jpm-13-00038-s001.zip]

Archive with 10 entries (10 files):
- Figure S1.pdf
- Figure S2.pdf
- Figure S3.pdf
- Table_S1_M_CKD_vs_ctrl_C8.test_results.xlsx
- Table_S2_F_CKD_vs_ctrl_C8.test_results.xlsx
- Table_S3_M_CKD_vs_ctrl_C7.test_results.xlsx
- Table_S4_F_CKD_vs_ctrl_C7.test_results.xlsx
- Table_S5_CKD_M_vs_ctrl.test_results.xlsx
- Table_S6_CKD_F_vs_ctrl.test_results.xlsx
- Table_S7_CKD_vs_ctrl.test_results.xlsx
