# Supplementary figures and images for: Urine-Based Detection of Biomarkers Indicative of Chronic Kidney Disease in a Patient Cohort from Ghana
Source: MDPI journal article supplement (doi:10.3390/jpm13010038), 2022-12-24

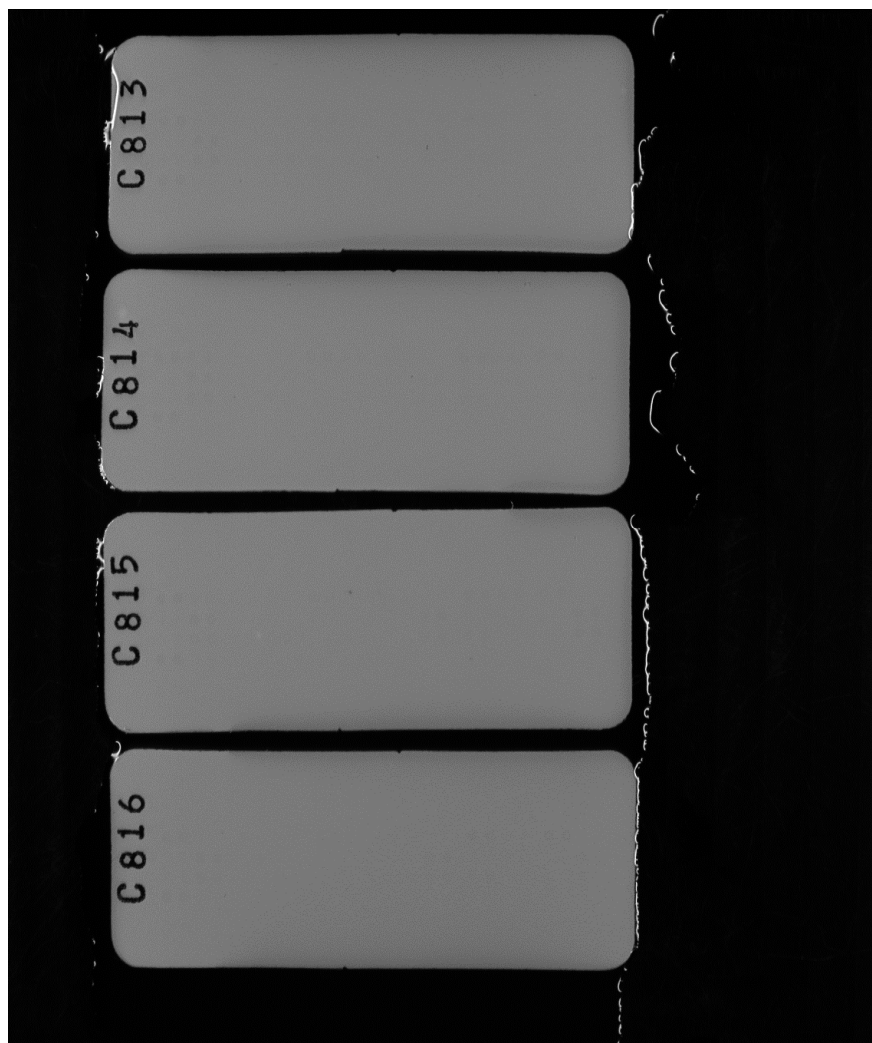

**C813: CDK male**  
**C814: CDK female**

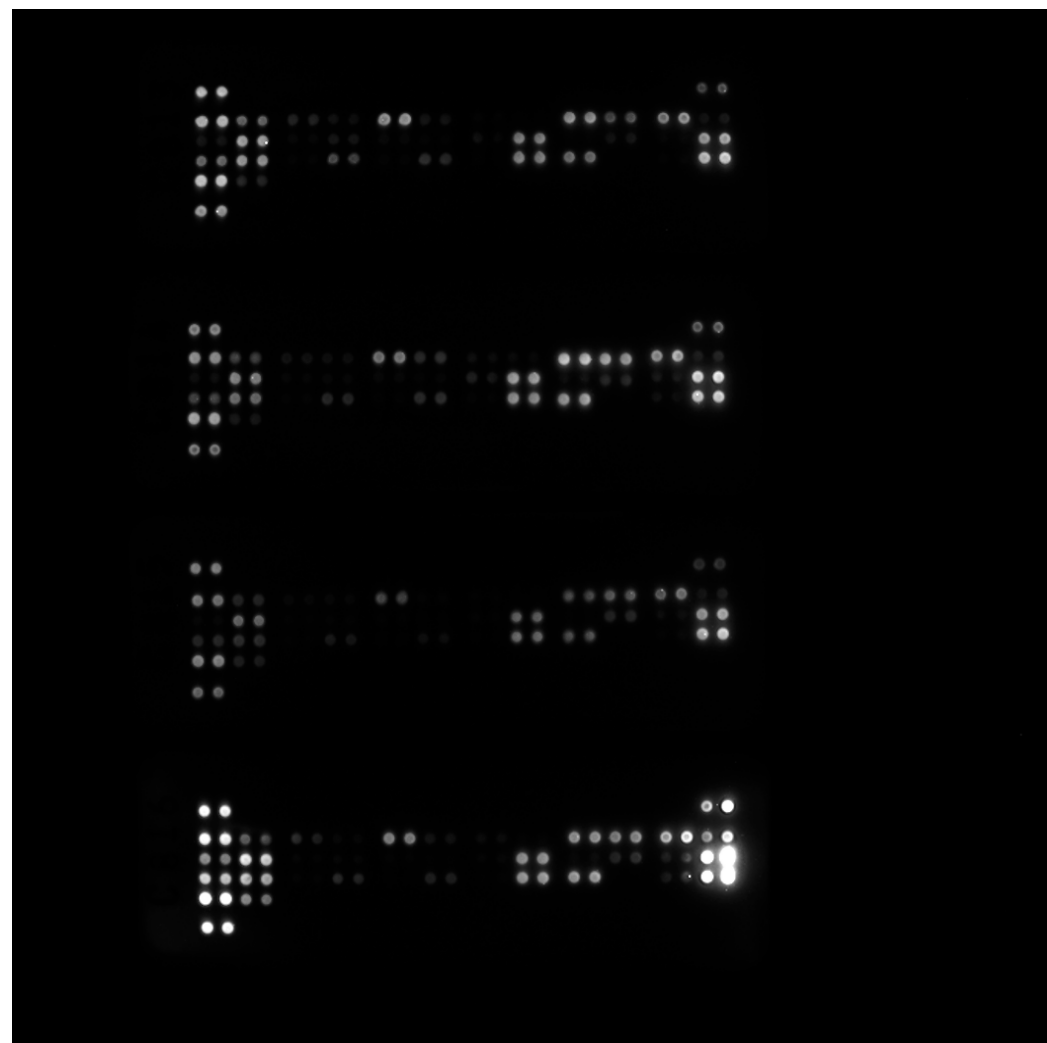

**C815: Control male**  
**C816: Control female**

Supplement: s1 [file s1]

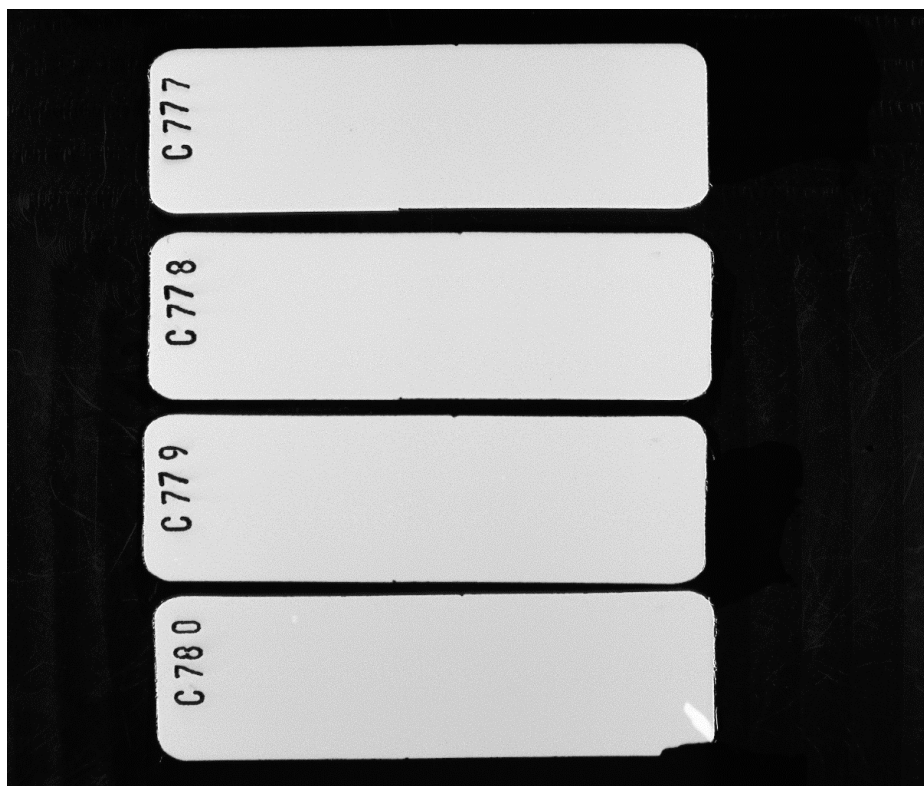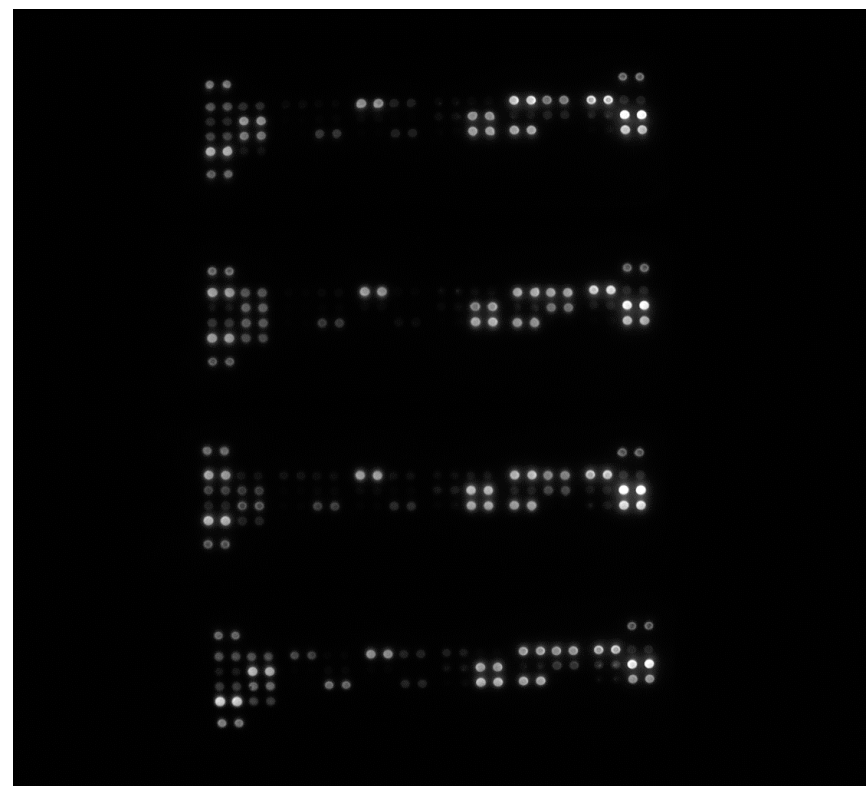

**C779: CDK male**  
**C780: CDK female**

**C777: Control male**  
**C778: Control female**

Supplement: s1 [file s1]

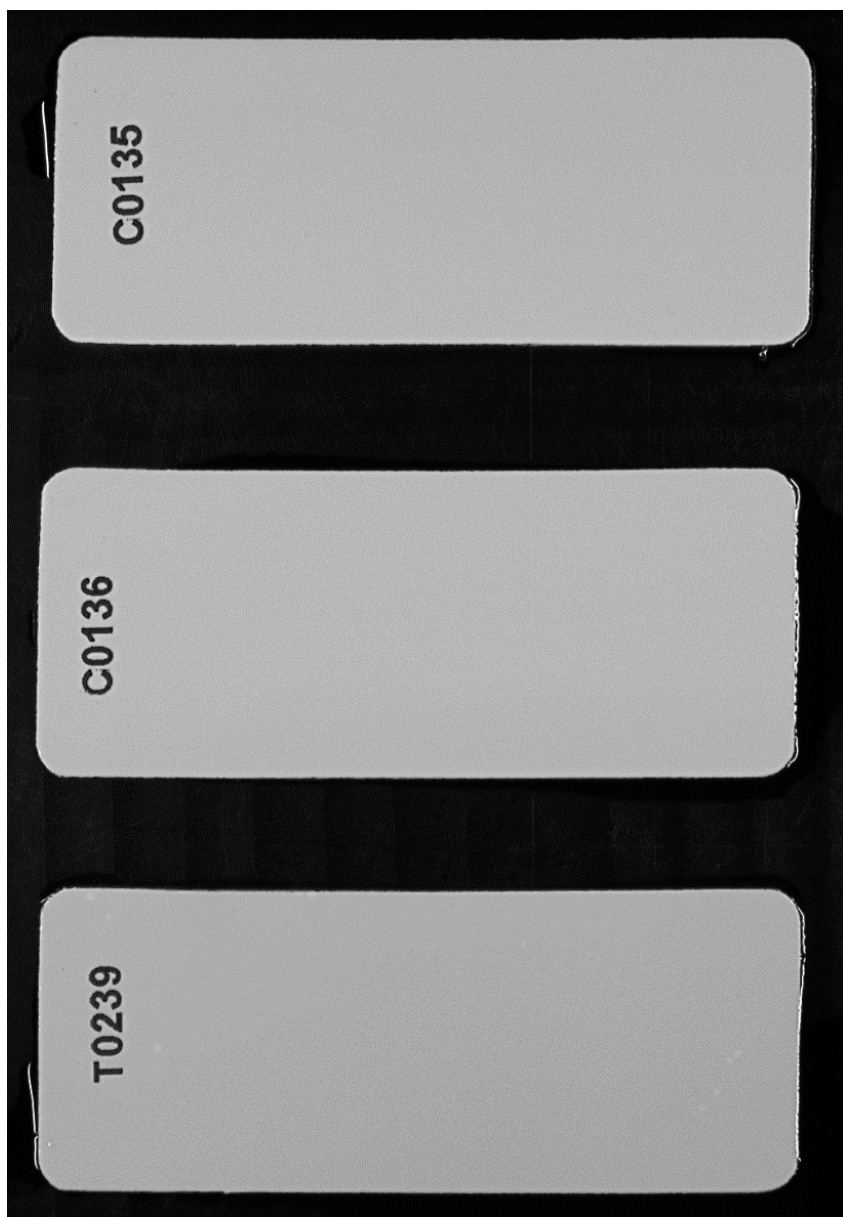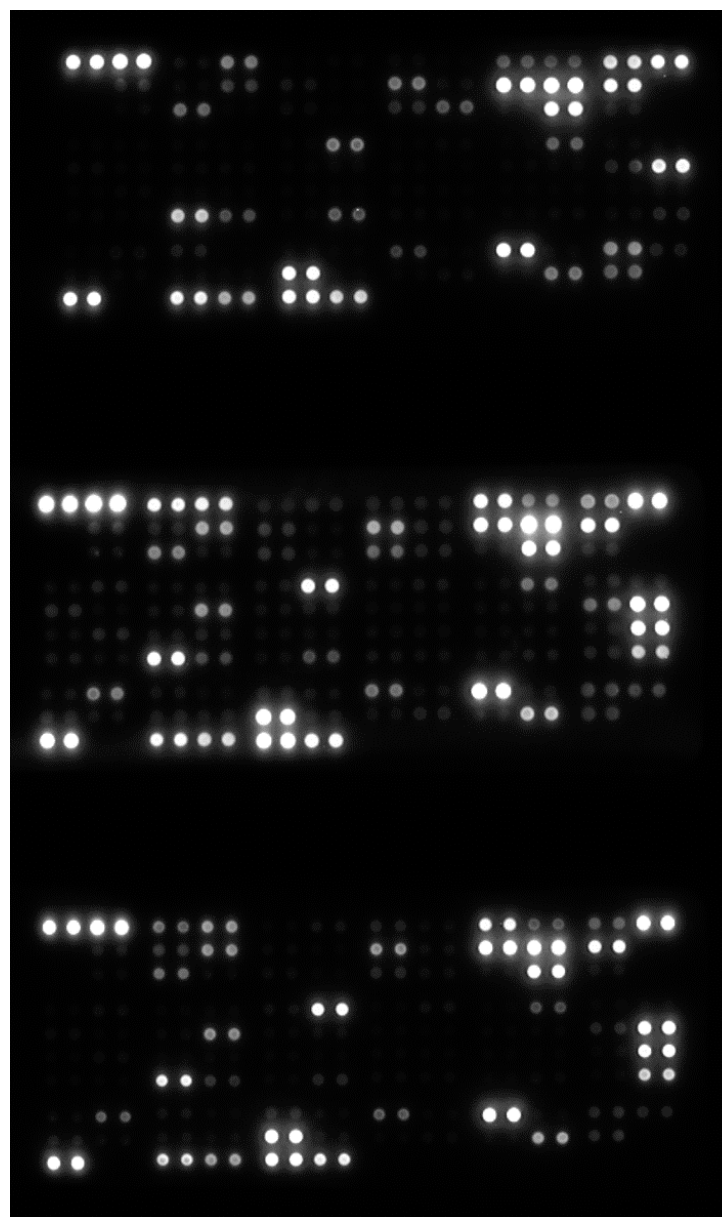

C0135: control one individual male

C0136: CDK pooled male

T0239: CDK pooled female

Supplement: s1 [file s1]
